# Supplementary material for: PDE3A Is a Highly Expressed Therapy Target in Myxoid Liposarcoma
Source: MDPI journal article supplement (doi:10.3390/cancers15225308), 2023-11-07
Supplement: s1 [file s1]

# PDE3A is a highly expressed therapy target in myxoid liposarcoma

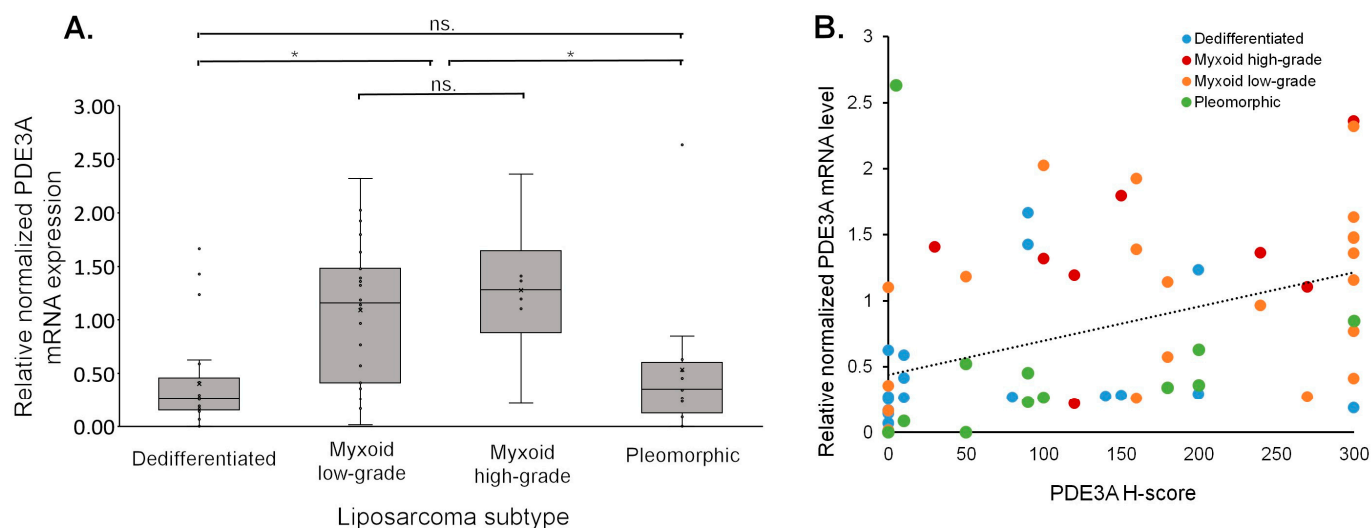

**Figure S1.** Validating PDE3A immunohistochemical staining in 63 LPS tissue results with RT-qPCR. (a) Strong PDE3A mRNA expression was observed in the myxoid subtype in comparison with other LPS subtypes. Data are presented as median relative to that of GIST882 cell line in FFPE (= 1). \* $p < 0.01$  (Kruskal-Wallis test). (b) PDE3A RT-qPCR and immunohistochemistry results showed a strong correlation (Spearman's  $\rho = 0.423$ ,  $p < 0.001$ ). Each dot represents mRNA expression mean of ( $n = 3$ ) biological replicates with the corresponding H-score value from immunohistochemical analysis of the sample. ns = not significant

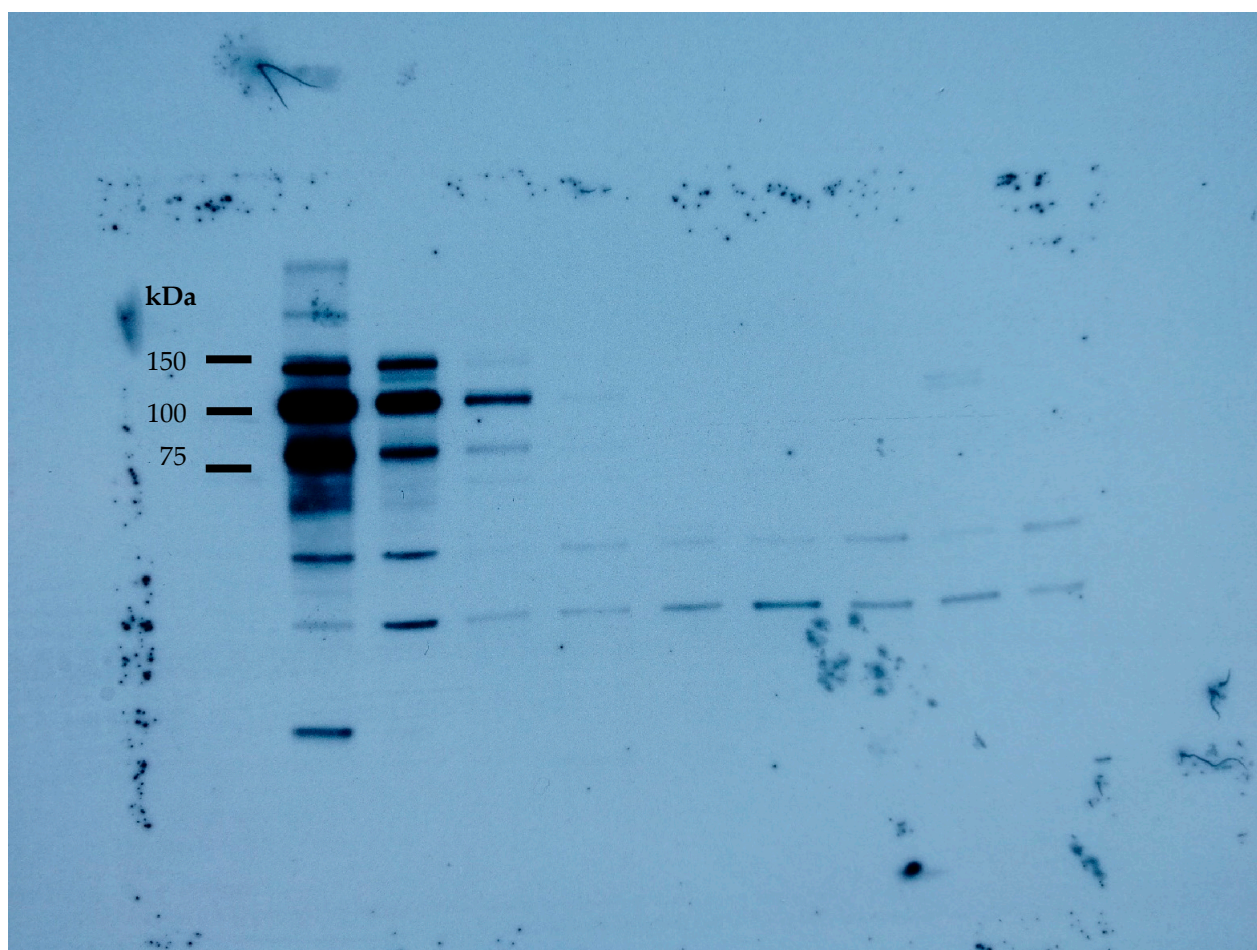

**Figure S2.** Unedited PDE3A western blot. 4 µg of protein/sample was loaded in wells in the following order: 1. GIST882, 2. SA4, 3. GOT3, 4. 93T449, 5. 94T778, 6. LPS141, 7. MLS1765-92, 8. MLS402-91, 9. SW872

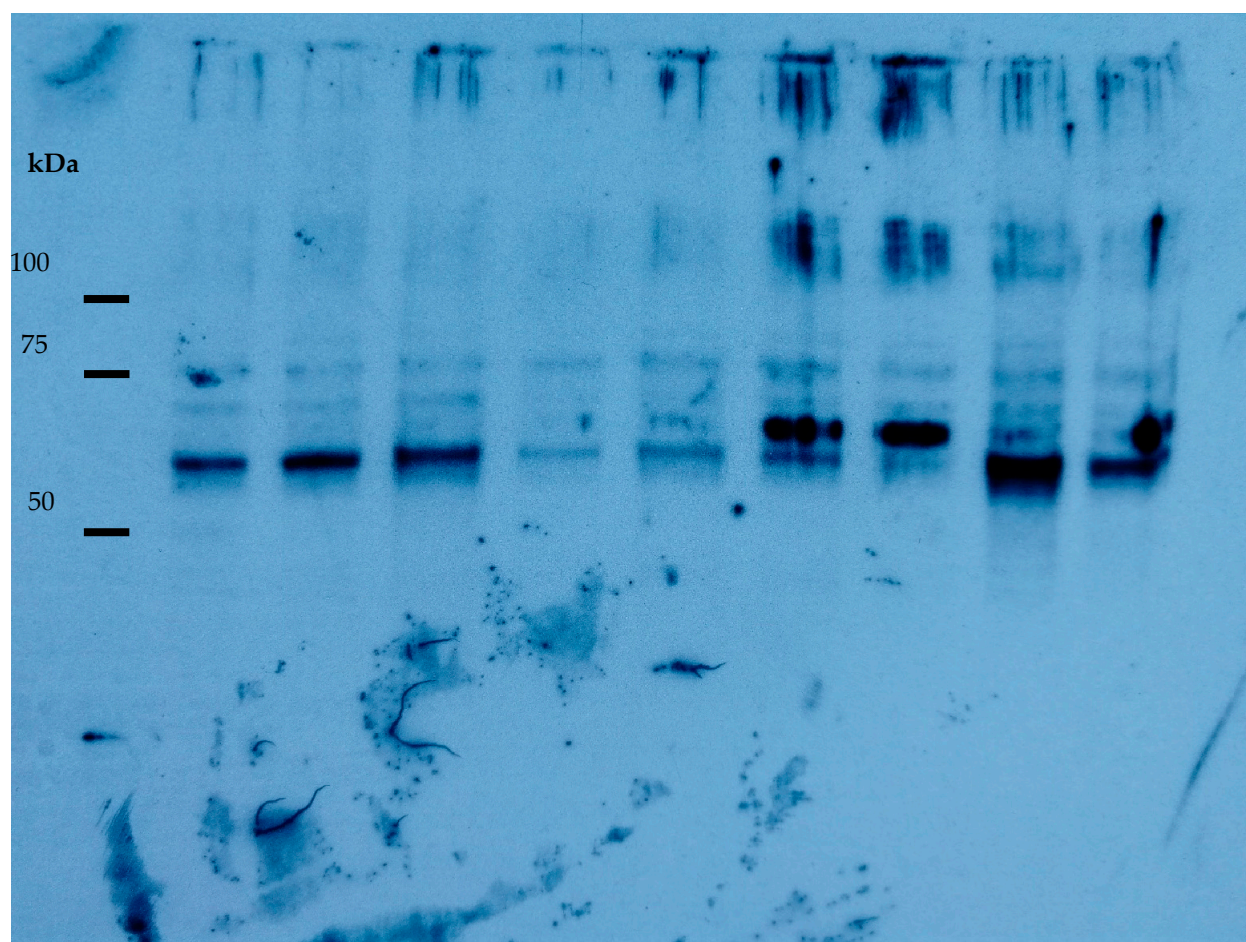

**Figure S3.** Unedited SLFN12 western blot. 4 µg of protein/sample was loaded in wells in the following order: 1. GIST882, 2. SA4, 3. GOT3, 4. 93T449, 5. 94T778, 6. LPS141, 7. MLS1765-92, 8. MLS402-91, 9. SW872



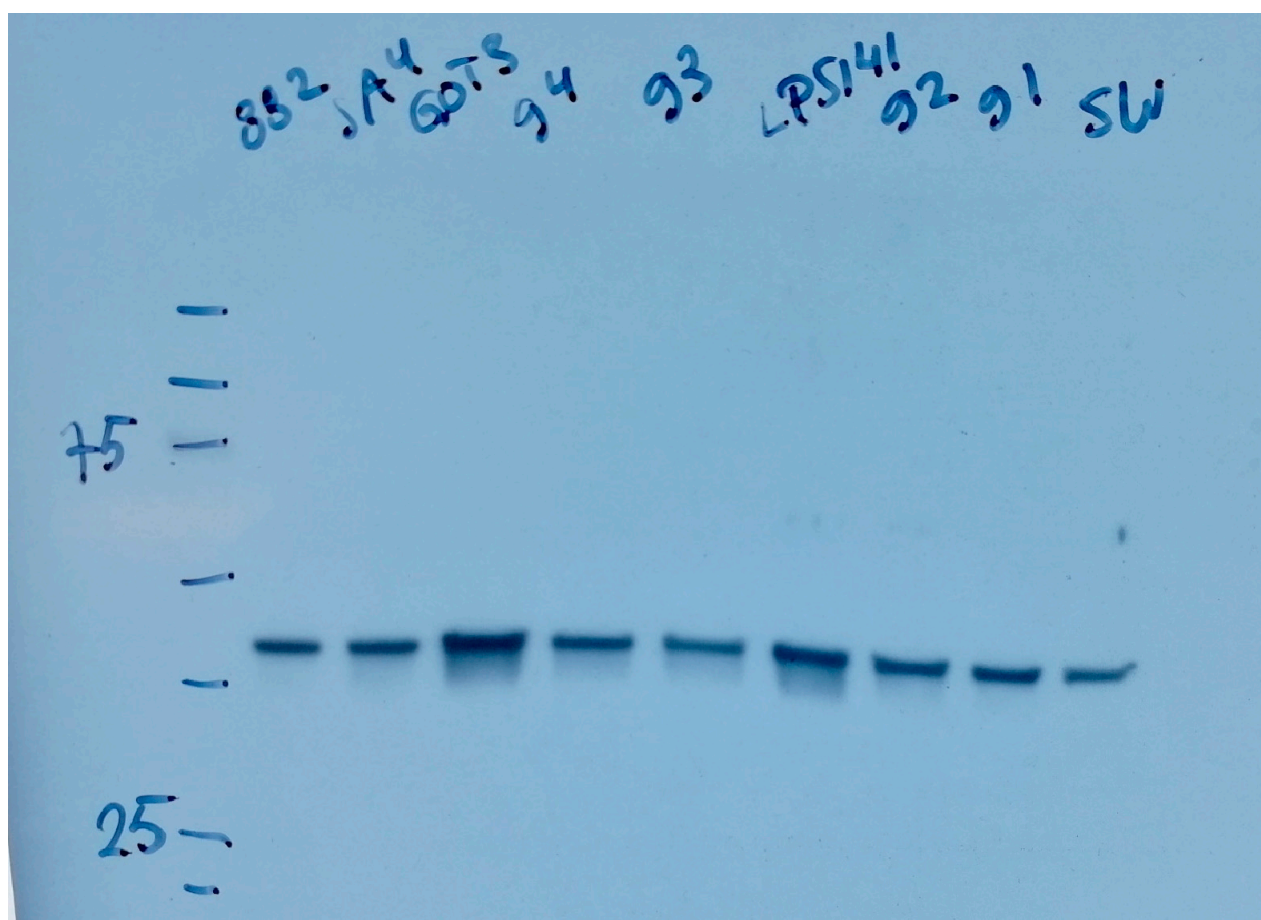

**Figure S4.** Unedited alpha actin western blot. 4 µg of protein/sample was loaded in wells in the following order: 1. GIST882, 2. SA4, 3. GOT3, 4. 93T449, 5.94T778, 6. LPS141, 7. MLS1765-92, 8. MLS402-91, 9. SW872

21

22

23

24
