# Supplementary material for: PDE3A Is a Highly Expressed Therapy Target in Myxoid Liposarcoma
Source: Cancers (Basel). 2023 Nov 7;15(22):5308. doi: 10.3390/cancers15225308 (PMC10669966; doi:10.3390/cancers15225308)
Supplement: Supplementary file 1 [file cancers-15-05308-s001.zip › Table S1.xlsx]

## Sheet: Sheet2
Sample ID	Total number of sequenced reads	Total number of uniquely mapped readsa	RNA Quality Score (RIN)	Ratio of all reads aligned to rRNA regions to total uniquely mapped reads (rRNA rate)	Ratio of exon-mapped reads to total uniquely mapped reads (Expression Profile Efficiency)	Genes Detected
LPS1_S24_R1_001-Quantseq_2_3_6_FWD-9863154b-0156-46ec-b657-cbf18a2e3fa7_output-folder | Star_jb6Owb | star	2748337	1054371	2.7	0.0122623	0.390612	14723
LPS2_S25_R1_001-Quantseq_2_3_6_FWD-4f6e800a-bc46-4e98-9205-d09fbd20bbfd_output-folder | Star_8pIXAp | star	11813071	5818533	2.6	0.0135268	0.360309	7854
LPS4_S27_R1_001-Quantseq_2_3_6_FWD-78aaacce-ea1e-4da9-b866-1c35ce5fbab0_output-folder | Star_NPmjGv | star	18552364	11774742	2.6	0.00774675	0.374004	15561
LPS6_S29_R1_001-Quantseq_2_3_6_FWD-9938480f-4335-48f7-9f17-deee9ade91df_output-folder | Star_dnlprv | star	12612597	8264353	2.6	0.0115997	0.356029	4031
LPS7_S30_R1_001-Quantseq_2_3_6_FWD-3f8474e8-fd36-4741-a309-83b416b925ca_output-folder | Star_PASTEK | star	7803548	3735591	2.5	0.0118991	0.338152	16217
LPS9_S32_R1_001-Quantseq_2_3_6_FWD-8f865ea4-49a3-4cd8-8125-1aa3c56bbd66_output-folder | Star_e6C0iw | star	17635687	12755023	2.6	0.0107544	0.353327	8812
LPS10_S33_R1_001-Quantseq_2_3_6_FWD-bfb6de3f-328f-4c73-962e-e0cdd158ea54_output-folder | Star_dJqrPL | star	36896586	13435132	2.6	0.0423414	0.383651	11262
LPS11_S34_R1_001-Quantseq_2_3_6_FWD-964f38e1-05b3-41a7-a513-69aea00fa81b_output-folder | Star_aCu9_3 | star	4465262	2259885	NA	0.0280974	0.40146	13896
LPS12_S35_R1_001-Quantseq_2_3_6_FWD-fe49ce6a-3465-4c92-9f45-8eea9b439b8e_output-folder | Star_j_TfFO | star	2180792	998125	NA	0.027751	0.364266	15564
LPS16_S38_R1_001-Quantseq_2_3_6_FWD-1ab01073-7500-48fd-b4b4-5fa00c237c68_output-folder | Star_kvTxHY | star	6367217	3184225	NA	0.0183768	0.337403	11186
LPS17_S39_R1_001_short-Quantseq_2_3_6_FWD-7a6b774e-c9ef-4dcf-b987-d7fc59fa0a3f_output-folder | Star_XqFpkU | star	7407401	3966014	2.6	0.030248	0.361638	16828
LPS18_S40_R1_001-Quantseq_2_3_6_FWD-1ea7007e-8b48-411f-b48a-6072f7965835_output-folder | Star_D5T6je | star	22556234	13282324	2.6	0.0222181	0.353584	15719
LPS19_S41_R1_001-Quantseq_2_3_6_FWD-211a3f33-b91d-4b52-9847-094bebf0a537_output-folder | Star_0iEdaj | star	5480623	3265540	2.6	0.0100611	0.37286	10076
LPS20_S42_R1_001-Quantseq_2_3_6_FWD-84c57880-190f-4be7-a5b8-592754124872_output-folder | Star_Pyr004 | star	12712585	7162643	2.6	0.00882537	0.319028	18601
LPS22_S44_R1_001-Quantseq_2_3_6_FWD-e4736beb-c356-4e7b-bf93-333f662ffeda_output-folder | Star_Joofhw | star	14253847	7566638	2.6	0.0166294	0.314657	16266
LPS23_S45_R1_001-Quantseq_2_3_6_FWD-65967760-6598-40a2-a4aa-6f5265156274_output-folder | Star_Rob7OG | star	11248298	7052581	2.6	0.0168469	0.397571	13974
LPS24_S46_R1_001-Quantseq_2_3_6_FWD-1c1010d1-ee97-4b78-9b13-44166071d801_output-folder | Star_zp3Gzc | star	7581214	4056078	2.4	0.00832479	0.382937	11972
LPS25_S47_R1_001-Quantseq_2_3_6_FWD-d8bee730-600a-4295-9bdb-468a20cc4a3f_output-folder | Star_l3yxAQ | star	10627084	4084170	2.6	0.00659424	0.307944	3821
LPS27_S49_R1_001-Quantseq_2_3_6_FWD-92d38f1f-bb71-44ed-baed-b54c0ab521ae_output-folder | Star_xY9Y3q | star	16630479	8625029	3.3	0.0382171	0.399141	6774
LPS28_S50_R1_001-Quantseq_2_3_6_FWD-9eddee97-a7f7-4e3b-bb44-9ee29efa7588_output-folder | Star__THYtZ | star	1092242	695098	2.6	0.00744787	0.305235	12356
LPS29_S51_R1_001-Quantseq_2_3_6_FWD-e9f582b2-ed63-4937-a6c4-f6eeb10330b3_output-folder | Star_iuVqLH | star	6304347	3122416	2.7	0.0206074	0.338718	15003
LPS30_S52_R1_001-Quantseq_2_3_6_FWD-9efd55c9-9f72-4cfe-8193-1c50bc9a6a37_output-folder | Star_E9x1C1 | star	4625512	2376073	NA	0.0134697	0.283065	14964
LPS31_S53_R1_001-Quantseq_2_3_6_FWD-a924f25c-a76d-4295-bfc0-eb12e9148f26_output-folder | Star_Tu6_uu | star	6792410	4736516	2.6	0.00939404	0.335971	11260
LPS32_S54_R1_001-Quantseq_2_3_6_FWD-5e1de79c-294d-4c34-ad89-da1c340805ab_output-folder | Star_bNf4L3 | star	4231263	2899030	2.6	0.00460085	0.314627	6066
LPS33_S55_R1_001-Quantseq_2_3_6_FWD-4574b912-c77f-4c04-98d3-7dc213911bcf_output-folder | Star_FcBezN | star	1128637	695029	2.6	0.0154641	0.296861	15243
LPS34_S56_R1_001-Quantseq_2_3_6_FWD-a65a793d-8fb8-4676-9df1-af1d37fe24c1_output-folder | Star_i1chPG | star	11864958	6788235	2.6	0.0173877	0.318872	18249
LPS35_S57_R1_001-Quantseq_2_3_6_FWD-f46714ee-1b28-4394-bb04-a9e136273433_output-folder | Star_IwlFvy | star	30703388	15249723	2.6	0.0356989	0.345093	13866
LPS36_S58_R1_001-Quantseq_2_3_6_FWD-063cd2c7-71fd-4bc1-b2d9-2a15752ae3dd_output-folder | Star_ZMp5SG | star	8731982	4204552	2.6	0.0134226	0.345567	13866
LPS37_S59_R1_001-Quantseq_2_3_6_FWD-ef4715dc-c769-44a0-b26a-ff76375a729b_output-folder | Star_MrPjuD | star	3342792	2052294	2.6	0.00876483	0.321732	13253
LPS38_S60_R1_001-Quantseq_2_3_6_FWD-1937eac7-e788-4937-83f0-17d40ca5e5e1_output-folder | Star_ETy3AJ | star	4546806	2919899	2.6	0.0061372	0.329412	19736
LPS39_S61_R1_001-Quantseq_2_3_6_FWD-96349f65-0409-4eb2-bd06-566b40890280_output-folder | Star_FmwTrC | star	35985956	17195387	2.6	0.0305778	0.361056	3659
LPS40_S62_R1_001-Quantseq_2_3_6_FWD-d449340e-67fa-4e9a-8a27-320016d889af_output-folder | Star_Q759k9 | star	9489226	7085812	2.6	0.010216	0.316801	7226
LPS41_S63_R1_001-Quantseq_2_3_6_FWD-191bc6da-567c-459b-a505-2242832bd703_output-folder | Star_7wHh43 | star	1656535	900221	2.7	0.0239808	0.338605	18760
LPS42_S64_R1_001-Quantseq_2_3_6_FWD-6bf882e7-0bcf-4309-acc1-82adb12b46b8_output-folder | Star_u8RW3H | star	26045275	15536216	2.6	0.0290318	0.371174	16428
LPS43_S65_R1_001-Quantseq_2_3_6_FWD-0007d909-6f53-45cc-9bb2-da8c91c2dc9d_output-folder | Star_2wDJr8 | star	13890497	8440671	2.6	0.00950991	0.337012	14751
LPS44_S66_R1_001-Quantseq_2_3_6_FWD-a8508924-f3ff-4d95-9136-447c33012599_output-folder | Star_xYecFC | star	8350768	5660274	2.6	0.0157492	0.364198	18202
LPS46_S68_R1_001-Quantseq_2_3_6_FWD-db79a74f-051c-4d49-899a-0b20bef32b03_output-folder | Star_9QXqNW | star	12293504	7667063	NA	0.0109017	0.315973	19429
LPS47_S69_R1_001-Quantseq_2_3_6_FWD-61f96d70-10fe-429e-8cd4-cca9e0d3ec89_output-folder | Star_tIRUE1 | star	33519819	18658115	2.5	0.018542	0.391518	6240
LPS48_S70_R1_001-Quantseq_2_3_6_FWD-d71a9511-5226-486f-b7d6-1dc9699c59ca_output-folder | Star_KE0LSG | star	1126268	700451	NA	0.00314226	0.263406	3922
LPS49_S71_R1_001-Quantseq_2_3_6_FWD-ab65cc26-1e76-4fdd-9955-14bd12fd6cb5_output-folder | Star_0DqTOl | star	531909	372748	2.7	0.00620258	0.253895	16417
LPS50_S72_R1_001-Quantseq_2_3_6_FWD-41315bf0-fcef-4388-801a-11fae81f8348_output-folder | Star_7tzT7P | star	16855691	10388592	2.6	0.0172345	0.364559	11060
LPS51_S73_R1_001-Quantseq_2_3_6_FWD-5a766f77-8bb8-4aef-8974-235df343479f_output-folder | Star_5C6EUy | star	5093724	2556078	NA	0.0135383	0.327901	8509
LPS54_S75_R1_001-Quantseq_2_3_6_FWD-2628b2b9-519b-4c81-a662-36cff437bee2_output-folder | Star_ljKIAZ | star	9802643	6313313	2.6	0.0118488	0.34295	14630
LPS55_S76_R1_001-Quantseq_2_3_6_FWD-76164155-dab7-4e7f-99e5-0024d103a495_output-folder | Star_MfLR5E | star	6761041	4687505	2.6	0.0113399	0.383665	13913
LPS57_S78_R1_001-Quantseq_2_3_6_FWD-2634d194-b566-487f-8374-721113997a6c_output-folder | Star_aU2hHK | star	18408850	8540229	2.6	0.0108372	0.355694	16033
LPS58_S79_R1_001-Quantseq_2_3_6_FWD-570c243f-b461-4b59-bf81-44a5f7cec3ae_output-folder | Star_SR4COx | star	13896770	7754766	2.6	0.0160759	0.344277	7844
LPS59_S80_R1_001-Quantseq_2_3_6_FWD-73b88844-0f64-4403-85f3-acf78ea1db12_output-folder | Star_9MOJeS | star	9677667	2687317	2.6	0.0129043	0.385921	2199
LPS61_S82_R1_001-Quantseq_2_3_6_FWD-00b54b70-46c6-4c7a-bfd4-9f03598d8768_output-folder | Star_pF5auH | star	2606127	1085394	2.7	0.00885669	0.340524	17899
LPS62_S83_R1_001-Quantseq_2_3_6_FWD-a458a89e-bc57-4d94-8460-7f0347b37f47_output-folder | Star_NE6N7o | star	17634386	10837068	2.7	0.0282013	0.47126	16734
LPS63_S84_R1_001-Quantseq_2_3_6_FWD-c589d290-13cc-46ce-acb3-70f60e645b01_output-folder | Star_d6O29m | star	23352826	11053883	4.8	0.0332765	0.36741	9902
LPS64_S85_R1_001-Quantseq_2_3_6_FWD-d24887ff-d45a-48e2-a58f-e86c59d3480b_output-folder | Star_0DzVhq | star	2631883	1548136	2.6	0.00789724	0.264616	5520
LPS69_S89_R1_001-Quantseq_2_3_6_FWD-b4f8ccc5-34bf-4a46-8f21-16d2ca9cf854_output-folder | Star_8VpMLT | star	8159992	4235979	2.6	0.0182607	0.336606	16147
LPS73_S91_R1_001-Quantseq_2_3_6_FWD-540392c5-fb4c-4fc3-b87f-2a93e3a7fdfb_output-folder | Star_T2QbG5 | star	26124000	13661793	NA	0.0242354	0.384412	9564
LPS74_S92_R1_001-Quantseq_2_3_6_FWD-31f3764c-239b-4cf8-be81-0b406f0f8db9_output-folder | Star_nWZyD6 | star	3458229	2000557	2.4	0.00734445	0.374002	14933
LPS75_S93_R1_001-Quantseq_2_3_6_FWD-7c77d782-2362-4085-9554-c62e2b957df9_output-folder | Star_c6rHwQ | star	16256910	7358617	NA	0.0401836	0.429387	7482
LPS78_S95_R1_001-Quantseq_2_3_6_FWD-5bb25a51-b027-4fd7-8f27-4c3b8f64092f_output-folder | Star_BQwBke | star	860736	390674	2.6	0.0114955	0.271784	13458
LPS79_S96_R1_001-Quantseq_2_3_6_FWD-156314ac-a3c7-48fc-b9e2-534c8f3c0a81_output-folder | Star_J7ao69 | star	8410619	3990732	NA	0.0150822	0.397604	12060
LPS80_S97_R1_001-Quantseq_2_3_6_FWD-13863ae6-e5ff-4a82-833a-aeac55aa9a68_output-folder | Star_KoNU0I | star	16602184	10350987	NA	0.022427	0.441181	18258
LPS81_S98_R1_001-Quantseq_2_3_6_FWD-7f4033f4-7702-475e-8d43-cd02b3c8bfbd_output-folder | Star_Q01Pn7 | star	32134817	16669780	NA	0.031555	0.319144	14382
LPS82_S99_R1_001-Quantseq_2_3_6_FWD-1dca6960-b77a-49ba-8ae4-d1b758f75baa_output-folder | Star_zuLrFg | star	23273816	10615450	NA	0.0137506	0.338009	16975
LPS83_S100_R1_001-Quantseq_2_3_6_FWD-a9c5744e-553c-4e77-ab02-6ee26c6e351d_output-folder | Star_3owQ__ | star	18359966	11148640	2.7	0.00949219	0.344439	13788
LPS84_S101_R1_001-Quantseq_2_3_6_FWD-6f493f38-44c6-4c05-8768-858ab7a2c6cb_output-folder | Star_7RrTZ8 | star	6353005	3436604	NA	0.0211971	0.41945	18403
LPS85_S102_R1_001-Quantseq_2_3_6_FWD-22f408d7-3dbc-47aa-94f7-aebd7b616214_output-folder | Star_gdmqMe | star	27523474	16732511	2.6	0.0366319	0.385613	9042
LPS88_S103_R1_001-Quantseq_2_3_6_FWD-55b5c233-f6f3-4862-a2e3-b96c11d27257_output-folder | Star_NaN7c2 | star	3423585	1989810	NA	0.0309567	0.346546	13988
LPS89_S104_R1_001-Quantseq_2_3_6_FWD-d6f0a818-9ac0-4070-b620-9a42433d71b0_output-folder | Star_3wF8BL | star	6489158	3926449	2.6	0.00573954	0.408356	7103
LPS92_S107_R1_001-Quantseq_2_3_6_FWD-0b001543-be84-415e-bac7-864378b1b9cb_output-folder | Star_ogJRFA | star	1777748	1036920	2.9	0.0171248	0.411227	12941
LPS94_S108_R1_001-Quantseq_2_3_6_FWD-97bc2be0-ac48-4cd3-8add-e39b87ef8fc3_output-folder | Star_APx65p | star	11508693	5431775	2.6	0.0296124	0.485448	7455
LPS95_S109_R1_001-Quantseq_2_3_6_FWD-2b685460-cbd1-4c34-9f8b-ce7e625c28a3_output-folder | Star_k8y_9r | star	1204924	741000	2.8	0.0235695	0.402259	18852
LPS96_S110_R1_001-Quantseq_2_3_6_FWD-267b4651-4a22-40ec-818b-3cf01407a782_output-folder | Star_5LDeYc | star	23187189	12437352	2.6	0.0588527	0.456272	11680
LPS97_S111_R1_001-Quantseq_2_3_6_FWD-1032381e-6aeb-4f78-ab48-c669e5b8bae7_output-folder | Star_kPoDbD | star	8290559	4132410	NA	0.0185993	0.391971	12942
LPS98_S112_R1_001-Quantseq_2_3_6_FWD-26004144-fd50-4848-be95-36b9041046f2_output-folder | Star_poUBVN | star	9112503	4670993	2.64768	0.013234	0.457471	11018
LPS99_S113_R1_001-Quantseq_2_3_6_FWD-84ee9aeb-6580-4595-9c7c-961633bf0b98_output-folder | Star_3cNX7M | star	4872813	2398177	NA	0.0116689	0.419768	17549
LPS100_S114_R1_001-Quantseq_2_3_6_FWD-b5d2fc73-feac-4c1d-a7ca-e2d82a29a27b_output-folder | Star_KPttTO | star	9419611	6048888	2.63026	0.0262002	0.429741	14544
LPS101_S115_R1_001-Quantseq_2_3_6_FWD-0aa7358a-f786-4341-bd71-ce5a0d247fcf_output-folder | Star_C95iQu | star	3961704	2350493	NA	0.0114134	0.372501	12037
LPS102_S116_R1_001-Quantseq_2_3_6_FWD-f7a0800d-bd27-4e7d-bec5-a4053e3d1230_output-folder | Star_fLmLXD | star	8723910	5531774	2.6904	0.0237479	0.436356	17547
LPS103_S117_R1_001-Quantseq_2_3_6_FWD-061587ab-5492-4b7f-b2a1-2943fddc8346_output-folder | Star_zgFrND | star	6747170	3740785	NA	0.0086538	0.412931	5544
LPS104_S118_R1_001-Quantseq_2_3_6_FWD-82d14309-60c3-4108-8ec7-5b4281c43f4f_output-folder | Star_V4JJq1 | star	25144164	11228757	2.54633	0.0163043	0.436537	10484
LPS106_S120_R1_001-Quantseq_2_3_6_FWD-596dc6bb-ec2e-46b3-bba8-3375282fe6da_output-folder | Star_rYADh8 | star	4435924	2236053	2.7752	0.0106294	0.453092	10490
LPS107_S121_R1_001-Quantseq_2_3_6_FWD-7581e774-97c4-4df7-a129-1e1dcbec5878_output-folder | Star_3Sfvlh | star	3095464	1767757	NA	0.0077126	0.344783	10151
LPS109_S123_R1_001-Quantseq_2_3_6_FWD-ae6cc63f-b0d0-422c-afc7-e333d656a373_output-folder | Star_Ti3v8E | star	2332514	1492273	NA	0.00755961	0.428929	14142
LPS110_S124_R1_001-Quantseq_2_3_6_FWD-bf096c50-7279-4917-b7cc-1425ece6374a_output-folder | Star_Luw1s_ | star	5988125	3843130	2.62604	0.0192408	0.378565	14130
LPS111_S125_R1_001-Quantseq_2_3_6_FWD-57582885-307b-4ebc-adf1-332e50346937_output-folder | Star_Yn1od6 | star	10351767	5579264	2.48953	0.014049	0.420765	18882
LPS112_S126_R1_001-Quantseq_2_3_6_FWD-999adfa3-d6aa-46c0-ad8d-a6df438543ed_output-folder | Star_CYaTpR | star	6974942	4606174	2.58152	0.0192904	0.42596	5984
LPS113_S127_R1_001-Quantseq_2_3_6_FWD-1942150b-3d36-4b56-a87f-bddaec134b80_output-folder | Star_E77EFV | star	29087437	18755446	2.54654	0.0167452	0.432674	18762
LPS115_S129_R1_001-Quantseq_2_3_6_FWD-54327a44-64b7-48f5-be1a-8b154b5bfb60_output-folder | Star_Jn_Vrp | star	28342008	20412047	10	0.00950855	0.415586	8422
LPS117_S130_R1_001-Quantseq_2_3_6_FWD-e79e6324-a53f-4a2d-9936-5379a6443a31_output-folder | Star_YQuT_1 | star	26303142	17610025	NA	0.00767557	0.415129	17056
LPS118_S131_R1_001-Quantseq_2_3_6_FWD-322df481-fc04-4e99-9a0f-463c0aca8789_output-folder | Star_48gkWB | star	3861287	2022009	2.45543	0.00747326	0.375788	11429
LPS119_S132_R1_001_short-Quantseq_2_3_6_FWD-7900c642-488e-4869-8fcb-c2505f415ad0_output-folder | Star_ebtOi5 | star	10998854	7639669	2.6563	0.0193862	0.436009	5768
LPS121_S134_R1_001-Quantseq_2_3_6_FWD-7f0f4d80-6fc1-42a6-ae5c-2afb76a1ea2f_output-folder | Star_FZZ2GA | star	12740589	8642627	NA	0.0154896	0.435032	17784
LPS123_S136_R1_001-Quantseq_2_3_6_FWD-c778d1ca-659c-44f5-870e-9a8506cefeff_output-folder | Star_543WzZ | star	25813110	17127496	2.69496	0.0203487	0.499804	10611
LPS124_S137_R1_001-Quantseq_2_3_6_FWD-add9e2aa-66e7-4748-9895-7ab8924cff9c_output-folder | Star_W8lrfP | star	6657531	3662890	NA	0.0133135	0.4732	12255
LPS125_S138_R1_001-Quantseq_2_3_6_FWD-68b4d7f4-2415-49fa-8572-e57387c4ab32_output-folder | Star_9m7DNn | star	4325035	2502230	NA	0.018348	0.44004	19621
LPS126_S139_R1_001-Quantseq_2_3_6_FWD-5adef6be-4b1f-496d-8c9a-4d55ba39b904_output-folder | Star_xUKqyD | star	7124738	3850277	NA	0.0133946	0.42495	7134
LPS155_S160_R1_001-Quantseq_2_3_6_FWD-ff9250ed-c6c9-47f9-b2db-7ce21b688e30_output-folder | Star_2toSQY | star	1837683	1172681	2.61921	0.0136729	0.385291	9881
LPS156_S161_R1_001-Quantseq_2_3_6_FWD-3f62e9a3-390b-4148-9ce8-1364abe0a041_output-folder | Star_GgD8G8 | star	5330034	3140465	2.57254	0.0110519	0.299929	11535
LPS157_S162_R1_001-Quantseq_2_3_6_FWD-8be0352a-825d-454e-8310-e553547fc2b0_output-folder | Star_L3qtXp | star	3593483	1939426	2.6842	0.0103293	0.276746	17518
LPS158_S163_R1_001-Quantseq_2_3_6_FWD-8578075a-fdad-4b52-9d88-c0e36bafe1e5_output-folder | Star_n0QnLQ | star	3322709	2277353	2.65379	0.00796407	0.379326	976
LPS159_S164_R1_001-Quantseq_2_3_6_FWD-43a47671-0e84-45c1-abea-3208d10cbf35_output-folder | Star_GAwLWw | star	24258052	15521509	NA	0.0123312	0.383967	16219
LPS160_S165_R1_001-Quantseq_2_3_6_FWD-e6dbc554-a070-4d6e-88ee-13c71c1ae2fa_output-folder | Star_NpYFxL | star	11278277	8314587	2.6356	0.00490776	0.424774	13615
LPS161_S166_R1_001-Quantseq_2_3_6_FWD-df2d878d-39af-4403-a071-c3f3c7380821_output-folder | Star_TbxAWv | star	7985600	4100494	2.59104	0.0100895	0.36961	17034
LPS163_S167_R1_001-Quantseq_2_3_6_FWD-3d1afa1b-9b72-4a99-b7dc-d9f01e06df53_output-folder | Star_BH57xE | star	8185973	5239532	2.62875	0.00877578	0.395569	15911
LPS164_S168_R1_001-Quantseq_2_3_6_FWD-df5e6316-c9a2-4a43-b2e4-32ac4c497a31_output-folder | Star_OZnQRM | star	22565800	12739533	2.58199	0.0482949	0.42567	12286
LPS169_S169_R1_001-Quantseq_2_3_6_FWD-45b3fe29-1b9b-489d-bf0e-50cd822583d2_output-folder | Star_wY3Bwi | star	13926292	9403858	2.6061	0.014107	0.430155	13474
LPS171_S171_R1_001-Quantseq_2_3_6_FWD-b2015d4e-2f1c-4381-a9eb-b9fb9b8ff6e8_output-folder | Star_RZfQj9 | star	12993210	9123075	NA	0.0104939	0.437581	6466
LPS172_S172_R1_001-Quantseq_2_3_6_FWD-ee789fc1-63f4-458f-a3ea-326f303509b6_output-folder | Star_Sa_Tcg | star	3008986	1630506	2.56996	0.0129218	0.288101	17654
LPS174_S174_R1_001-Quantseq_2_3_6_FWD-aa95d016-70d4-4825-be98-c4eeae63c922_output-folder | Star_SqIS3z | star	28108242	18927883	2.59261	0.00644885	0.463699	11778
LPS175_S175_R1_001-Quantseq_2_3_6_FWD-fc12599b-0897-4ef5-b341-e0da77e1984a_output-folder | Star_hXjaD_ | star	2387910	1155529	2.60769	0.00434952	0.251545	14697
LPS176_S176_R1_001-Quantseq_2_3_6_FWD-1cf7086f-5ec5-46cb-9722-fd88b7c997fa_output-folder | Star_6PnTUZ | star	4174057	2549556	NA	0.0183538	0.483819	13574
LPS178_S177_R1_001-Quantseq_2_3_6_FWD-934cefb9-818e-496d-a85b-e8761fd5d6fd_output-folder | Star_jQmTuH | star	15224615	9117272	2.68816	0.0156765	0.408734	13975
LPS179_S178_R1_001-Quantseq_2_3_6_FWD-d48c8669-0f18-4dd0-9afb-adededd615f8_output-folder | Star_pe4WZX | star	10212572	6404820	NA	0.0227444	0.483245	4928
LPS182_S180_R1_001-Quantseq_2_3_6_FWD-b3e2fc81-836f-4e53-a3c4-fa54ca7f2f7d_output-folder | Star_mZUR_6 | star	13630813	9550200	2.71659	0.0162844	0.453677	13930
LPS185_S182_R1_001-Quantseq_2_3_6_FWD-8e6b97a6-0c7b-47f8-a707-379d0ee719d1_output-folder | Star_oN2Zvq | star	7793297	4171548	2.91328	0.011997	0.437923	8517
LPS187_S183_R1_001-Quantseq_2_3_6_FWD-a4bfc14b-56d5-47f6-a61d-89de2104b80d_output-folder | Star_K2UgG5 | star	19495513	12785625	2.75783	0.0211053	0.413053	8790
LPS188_S184_R1_001-Quantseq_2_3_6_FWD-4984d50e-2f04-47fb-8266-4e45eaa386ad_output-folder | Star_RyjBNY | star	1798397	1053518	NA	0.0194558	0.453552	17352
LPS190_S186_R1_001_short-Quantseq_2_3_6_FWD-284d824e-05d5-4d6a-a3c8-52d53a4b651d_output-folder | Star_5ykdeu | star	10842955	7629045	2.60429	0.0207064	0.508263	10618
LPS192_S38_L002_R1_001-Quantseq_2_3_6_FWD-38ed9a83-ae61-4c9d-be55-f1f9dc9e9798_output-folder | Star_TjqEWc | star	2501036	1605930	NA	0.0167766	0.441772	8626
LPS193_S39_L002_R1_001-Quantseq_2_3_6_FWD-05e6278c-abe5-4819-a86d-0d406bc65107_output-folder | Star_09H_uH | star	2839188	1749284	2.95834	0.00839944	0.360625	14849
LPS195_S40_L002_R1_001-Quantseq_2_3_6_FWD-f8b73397-f729-4a88-811a-3a0a1e1c7722_output-folder | Star_IP3pj7 | star	2384496	1374152	NA	0.00440708	0.422807	16910
LPS196_S41_L002_R1_001-Quantseq_2_3_6_FWD-13d40edd-99f9-4ed9-8900-5e44091aaef0_output-folder | Star_Ae5G91 | star	10277179	6324579	2.56896	0.0117197	0.395974	8742
LPS197_S42_L002_R1_001-Quantseq_2_3_6_FWD-9cdb0ef9-7654-4e7f-87b2-eabeeb815e4c_output-folder | Star_Uhw7lZ | star	24032042	11524996	2.5486	0.0471097	0.456786	12696
LPS198_S43_L002_R1_001-Quantseq_2_3_6_FWD-c61ddd98-8efd-4285-b581-c44577fd6919_output-folder | Star_jskHP_ | star	2852338	1586463	2.66233	0.00648739	0.332743	13027
LPS199_S44_L002_R1_001-Quantseq_2_3_6_FWD-772f3bad-53f4-433f-a90d-519902701d02_output-folder | Star_PYF4Hn | star	8390430	4115433	2.5765	0.0144845	0.32429	6634
LPS200_S45_L002_R1_001-Quantseq_2_3_6_FWD-ededfe14-57e1-4f1b-97cc-274982d87a5f_output-folder | Star_vqd6Zn | star	3509070	1838527	2.55485	0.011135	0.339243	15985
LPS202_S46_L002_R1_001-Quantseq_2_3_6_FWD-9cd9ede8-4afc-4673-a642-14a0a4b1a413_output-folder | Star_8LkFtE | star	20477551	13383498	2.56154	0.0305895	0.482547	12781
LPS204_S47_L002_R1_001-Quantseq_2_3_6_FWD-84ef80ff-0d18-4c50-a327-5889fb3dcbf1_output-folder | Star_a6f9Qq | star	13375614	8835659	2.71297	0.0174372	0.363726	9442
LPS205_S48_L002_R1_001-Quantseq_2_3_6_FWD-72931e6a-4ad1-415a-aec5-849505f76dc5_output-folder | Star_Al42H7 | star	7036916	3404756	2.58761	0.00911225	0.335996	8050
LPS206_S49_L002_R1_001-Quantseq_2_3_6_FWD-b7f3192b-26bf-44e1-8b54-bc16519be9d5_output-folder | Star_I5YGiJ | star	2618082	1416265	2.92839	0.0169714	0.335377	17245
LPS207_S50_L002_R1_001-Quantseq_2_3_6_FWD-76c4b14e-9b57-4515-bd08-3d872306e170_output-folder | Star_lvV1em | star	1562805	968362	2.59826	0.00515716	0.310961	14929
LPS208_S51_L002_R1_001-Quantseq_2_3_6_FWD-4dc5c88a-9c67-431e-b7a9-63d351a53e92_output-folder | Star_5h9rBT | star	21355276	14312526	2.6813	0.00492268	0.477201	13790
LPS210_S52_L002_R1_001-Quantseq_2_3_6_FWD-ea0c07fb-3aea-49ca-8762-e2c5fad19b12_output-folder | Star_VwCSrl | star	5551309	3896286	2.38046	0.00382929	0.305167	13251
LPS211_S53_L002_R1_001-Quantseq_2_3_6_FWD-0c708474-10be-4dbf-9241-2048cf37dc64_output-folder | Star_pe7sQO | star	846372	388249	NA	0.0157914	0.370152	820
