# Supplementary material for: PDE3A Is a Highly Expressed Therapy Target in Myxoid Liposarcoma
Source: Cancers (Basel). 2023 Nov 7;15(22):5308. doi: 10.3390/cancers15225308 (PMC10669966; doi:10.3390/cancers15225308)
Supplement: Supplementary file 1 [file cancers-15-05308-s001.zip › Table S2.xlsx]

## Sheet: Dedifferentiated LPS
	ENSEMBL	SYMBOL	logFC	logCPM	PValue
1	ENSG00000111087	GLI1	4.01894	5.22462	8.56741e-12
2	ENSG00000164161	HHIP	3.98137	5.89888	2.80126e-11
3	ENSG00000135454	B4GALNT1	3.32237	5.23014	3.87526e-13
4	ENSG00000116183	PAPPA2	2.85615	4.51112	5.15904e-07
5	ENSG00000131409	LRRC4B	2.82799	4.0854	4.03113e-07
6	ENSG00000138829	FBN2	2.7315	4.90658	3.98365e-11
7	ENSG00000054179	ENTPD2	2.67164	4.1433	1.50887e-08
8	ENSG00000185920	PTCH1	2.56552	6.88069	5.03988e-11
9	ENSG00000037897	METTL1	2.5302	6.47152	9.34224e-14
10	ENSG00000198756	COLGALT2	2.49945	4.73939	3.79483e-09
11	ENSG00000137558	PI15	2.45792	5.17779	1.23875e-07
12	ENSG00000135407	AVIL	2.45726	6.75565	2.07857e-14
13	ENSG00000185274	GALNT17	2.333	4.60836	1.37434e-08
14	ENSG00000149948	HMGA2	2.30761	7.44128	3.19307e-05
15	ENSG00000090376	IRAK3	2.30671	6.82854	1.38833e-14
16	ENSG00000182752	PAPPA	2.2626	6.96968	3.76204e-09
17	ENSG00000175782	SLC35E3	2.24041	9.54123	6.67619e-15
18	ENSG00000166896	ATP23	2.23082	4.44081	4.67162e-09
19	ENSG00000127337	YEATS4	2.22597	6.95411	7.24311e-13
20	ENSG00000167371	PRRT2	2.19469	6.76596	6.21204e-10
21	ENSG00000105464	GRIN2D	2.18803	4.2081	1.81081e-07
22	ENSG00000065320	NTN1	2.16752	4.08837	4.90202e-08
23	ENSG00000258947	TUBB3	2.14189	3.25427	1.50081e-06
24	ENSG00000131094	C1QL1	2.10236	3.84279	8.84879e-06
25	ENSG00000135679	MDM2	2.09958	9.93233	1.12372e-11
26	ENSG00000205795	CYS1	2.09178	2.63304	1.61965e-06
27	ENSG00000120149	MSX2	2.08866	3.06524	4.40774e-05
28	ENSG00000134460	IL2RA	2.07524	3.98979	1.22108e-06
29	ENSG00000179772	FOXS1	2.07452	4.06128	5.46964e-06
30	ENSG00000146197	SCUBE3	2.0574	5.33734	0.00018478
31	ENSG00000102174	PHEX	2.01283	4.0641	5.46292e-05
32	ENSG00000127328	RAB3IP	2.00045	6.59291	7.85187e-09
33	ENSG00000111581	NUP107	1.98399	8.37599	8.2573e-12
34	ENSG00000166225	FRS2	1.9815	7.80789	4.75755e-13
35	ENSG00000126218	F10	1.98005	3.23676	2.46259e-05
36	ENSG00000163564	PYHIN1	1.91815	3.29784	2.91616e-05
37	ENSG00000135452	TSPAN31	1.91231	7.81514	1.50646e-09
38	ENSG00000181690	PLAG1	1.90923	5.08239	7.59958e-06
39	ENSG00000143603	KCNN3	1.89986	5.006	2.2238e-08
40	ENSG00000123297	TSFM	1.89816	6.29203	4.96212e-13
41	ENSG00000240771	ARHGEF25	1.88462	6.17326	5.43436e-09
42	ENSG00000099337	KCNK6	1.85633	4.28276	4.52629e-06
43	ENSG00000073792	IGF2BP2	1.81095	6.46533	1.38938e-06
44	ENSG00000173762	CD7	1.80993	3.86827	1.99033e-05
45	ENSG00000135643	KCNMB4	1.80144	4.81	1.13384e-06
46	ENSG00000123427	EEF1AKMT3	1.80116	6.12639	2.93372e-09
47	ENSG00000178498	DTX3	1.7996	6.34941	1.26635e-09
48	ENSG00000139220	PPFIA2	1.78885	4.03318	4.19027e-05
49	ENSG00000198929	NOS1AP	1.78502	3.69587	2.43126e-05
50	ENSG00000175745	NR2F1	1.76314	7.17145	5.33794e-09
51	ENSG00000070190	DAPP1	1.75648	3.51896	6.73893e-06
52	ENSG00000177425	PAWR	1.75017	5.51932	8.35129e-11
53	ENSG00000154451	GBP5	1.74619	4.62177	1.28521e-05
54	ENSG00000100351	GRAP2	1.73407	3.39127	2.2171e-05
55	ENSG00000140287	HDC	1.71787	3.94234	0.000322089
56	ENSG00000182836	PLCXD3	1.70892	3.40149	0.000431114
57	ENSG00000146285	SCML4	1.70166	3.3726	0.000181955
58	ENSG00000111058	ACSS3	1.6949	5.3428	1.50287e-08
59	ENSG00000186818	LILRB4	1.69366	4.02347	2.59991e-06
60	ENSG00000197594	ENPP1	1.69124	6.14104	6.73957e-07
61	ENSG00000018236	CNTN1	1.68807	3.04241	0.000532343
62	ENSG00000003096	KLHL13	1.67312	4.19099	6.78215e-06
63	ENSG00000079931	MOXD1	1.67039	5.13584	0.000519158
64	ENSG00000101144	BMP7	1.66612	4.37038	0.000267841
65	ENSG00000149633	KIAA1755	1.66068	4.27124	1.17487e-05
66	ENSG00000125735	TNFSF14	1.65624	3.53582	0.000582384
67	ENSG00000172458	IL17D	1.63381	2.71893	0.000379232
68	ENSG00000187398	LUZP2	1.63182	4.24798	0.000722247
69	ENSG00000135378	PRRG4	1.62917	2.80794	0.000243669
70	ENSG00000144619	CNTN4	1.62684	4.18052	0.000225272
71	ENSG00000189129	PLAC9	1.61406	7.85854	5.04162e-10
72	ENSG00000101098	RIMS4	1.61171	5.04343	0.000572014
73	ENSG00000139266	MARCHF9	1.60494	7.70703	1.2644e-07
74	ENSG00000132000	PODNL1	1.59833	2.7532	0.000138626
75	ENSG00000127720	METTL25	1.59567	4.47674	2.52057e-06
76	ENSG00000134668	SPOCD1	1.58539	4.19435	0.000200104
77	ENSG00000143127	ITGA10	1.57982	3.9672	2.15033e-05
78	ENSG00000185008	ROBO2	1.57318	4.58839	8.76542e-05
79	ENSG00000118777	ABCG2	1.5691	3.25272	0.000148235
80	ENSG00000123572	NRK	1.56594	5.10195	6.93179e-05
81	ENSG00000134830	C5AR2	1.56177	3.76267	8.80493e-07
82	ENSG00000105639	JAK3	1.56078	4.86435	2.09129e-05
83	ENSG00000184347	SLIT3	1.55818	6.45538	5.67126e-09
84	ENSG00000080031	PTPRH	1.54729	3.60687	0.000210302
85	ENSG00000177688	SUMO4	1.53767	2.85672	8.11951e-06
86	ENSG00000095397	WHRN	1.5339	4.28253	9.48091e-05
87	ENSG00000157782	CABP1	1.53085	3.91043	0.000117554
88	ENSG00000163106	HPGDS	1.52683	3.64509	1.52216e-05
89	ENSG00000163071	SPATA18	1.52355	3.52563	0.000335988
90	ENSG00000214212	C19orf38	1.52076	3.83489	0.000317473
91	ENSG00000159733	ZFYVE28	1.51999	3.37869	8.23455e-06
92	ENSG00000049249	TNFRSF9	1.51815	3.81593	0.000713443
93	ENSG00000198768	APCDD1L	1.5156	3.88453	0.000559752
94	ENSG00000183918	SH2D1A	1.51345	3.20957	0.00104412
95	ENSG00000174099	MSRB3	1.51261	6.28986	1.05373e-08
96	ENSG00000145506	NKD2	1.51068	3.75865	0.00200937
97	ENSG00000077274	CAPN6	1.50262	6.56752	0.0011745

## Sheet: Myxoid LPS
	ENSEMBL	SYMBOL	logFC	logCPM	PValue
1	ENSG00000188219	POTEE	6.72378	3.0957	2.45491e-34
2	ENSG00000214415	GNAT3	6.00992	5.12107	2.63979e-24
3	ENSG00000162105	SHANK2	5.40764	5.45139	4.2321e-34
4	ENSG00000179520	SLC17A8	5.10614	4.49915	7.14068e-20
5	ENSG00000138136	LBX1	4.75712	5.28943	3.44113e-25
6	ENSG00000156687	UNC5D	4.66619	4.90545	6.53057e-24
7	ENSG00000146090	RASGEF1C	4.49138	2.79629	1.29084e-22
8	ENSG00000141255	SPATA22	4.38746	3.70255	4.47551e-19
9	ENSG00000162873	KLHDC8A	4.30333	4.18723	8.30548e-19
10	ENSG00000166126	AMN	4.15873	3.74348	1.3435e-20
11	ENSG00000198914	POU3F3	4.08677	3.97966	5.5783e-18
12	ENSG00000126890	CTAG2	4.0742	6.20885	7.81813e-12
13	ENSG00000183971	NPW	4.03418	4.17571	3.46847e-16
14	ENSG00000183117	CSMD1	3.98005	4.92176	4.31069e-19
15	ENSG00000145808	ADAMTS19	3.9704	5.02269	3.84578e-16
16	ENSG00000182968	SOX1	3.92782	2.94342	8.71656e-15
17	ENSG00000112246	SIM1	3.9267	7.66203	4.24146e-23
18	ENSG00000010310	GIPR	3.85525	6.94426	2.29206e-18
19	ENSG00000165973	NELL1	3.80298	3.54956	1.45801e-15
20	ENSG00000175497	DPP10	3.78263	2.61522	3.47012e-14
21	ENSG00000144821	MYH15	3.7775	5.48357	8.46811e-19
22	ENSG00000050767	COL23A1	3.74517	3.98862	1.78772e-18
23	ENSG00000137561	TTPA	3.74337	3.09658	1.66339e-13
24	ENSG00000162989	KCNJ3	3.68294	4.65649	2.153e-16
25	ENSG00000138696	BMPR1B	3.54164	4.67759	4.84059e-19
26	ENSG00000172987	HPSE2	3.53058	4.83855	8.01382e-17
27	ENSG00000160963	COL26A1	3.53036	2.76623	2.04918e-13
28	ENSG00000006128	TAC1	3.51592	4.93925	9.19475e-11
29	ENSG00000139155	SLCO1C1	3.5046	5.06433	2.78741e-19
30	ENSG00000088538	DOCK3	3.41827	3.38999	1.20561e-11
31	ENSG00000123243	ITIH5	3.41159	8.82457	1.28251e-34
32	ENSG00000106689	LHX2	3.40028	5.29681	1.25788e-15
33	ENSG00000121207	LRAT	3.39842	3.50197	4.69472e-13
34	ENSG00000159184	HOXB13	3.34782	2.91876	1.02304e-11
35	ENSG00000167434	CA4	3.33044	4.70904	1.61397e-16
36	ENSG00000198838	RYR3	3.29342	4.65455	9.98323e-15
37	ENSG00000139364	TMEM132B	3.28562	4.03159	8.4719e-16
38	ENSG00000120729	MYOT	3.24372	4.08996	1.07591e-07
39	ENSG00000236279	CLEC2L	3.24273	3.53346	5.22469e-13
40	ENSG00000043591	ADRB1	3.23545	4.58327	9.50092e-12
41	ENSG00000095203	EPB41L4B	3.23457	4.3277	2.89572e-20
42	ENSG00000122778	KIAA1549	3.22772	5.06105	4.70308e-24
43	ENSG00000120332	TNN	3.17811	4.14096	7.90571e-12
44	ENSG00000164764	SBSPON	3.16567	6.05589	1.3215e-12
45	ENSG00000123407	HOXC12	3.1482	3.33076	2.35197e-11
46	ENSG00000171772	SYCE1	3.12383	4.81667	3.99496e-10
47	ENSG00000109927	TECTA	3.09674	3.73707	3.98553e-10
48	ENSG00000106078	COBL	3.09143	3.88261	2.72758e-15
49	ENSG00000125931	CITED1	3.0663	3.59875	3.53872e-11
50	ENSG00000197893	NRAP	3.04016	5.57514	1.39855e-07
51	ENSG00000113361	CDH6	3.01644	5.54126	6.09582e-16
52	ENSG00000082556	OPRK1	2.98832	3.39319	9.39943e-10
53	ENSG00000076555	ACACB	2.96673	8.31656	1.41838e-25
54	ENSG00000159173	TNNI1	2.96228	6.72766	4.71917e-06
55	ENSG00000164418	GRIK2	2.93658	4.38094	6.17274e-10
56	ENSG00000240045	STRIT1	2.93502	4.31723	3.32496e-06
57	ENSG00000198300	PEG3	2.9341	7.9337	2.3965e-17
58	ENSG00000198759	EGFL6	2.92173	6.00957	1.24533e-11
59	ENSG00000183091	NEB	2.91302	9.77612	2.72599e-10
60	ENSG00000174804	FZD4	2.84444	8.13259	1.68635e-36
61	ENSG00000183837	PNMA3	2.83996	4.06314	1.32694e-11
62	ENSG00000185352	HS6ST3	2.77532	3.05384	5.23153e-08
63	ENSG00000170807	LMOD2	2.76716	4.95469	8.68267e-06
64	ENSG00000231887	PRH1	2.76662	3.83916	4.62279e-11
65	ENSG00000167971	CASKIN1	2.76643	2.72543	2.42835e-10
66	ENSG00000137672	TRPC6	2.73345	3.86309	3.76296e-13
67	ENSG00000090530	P3H2	2.72329	6.00496	5.50509e-18
68	ENSG00000165810	BTNL9	2.71736	7.72629	7.41494e-21
69	ENSG00000221818	EBF2	2.71429	8.08689	1.74746e-24
70	ENSG00000183914	DNAH2	2.6903	3.49474	1.02321e-09
71	ENSG00000108001	EBF3	2.68765	7.03142	3.63756e-19
72	ENSG00000165238	WNK2	2.68374	3.99989	7.73027e-12
73	ENSG00000177791	MYOZ1	2.67563	5.20322	1.71362e-05
74	ENSG00000148677	ANKRD1	2.6638	4.29623	1.18207e-05
75	ENSG00000153246	PLA2R1	2.6631	7.10371	1.12059e-30
76	ENSG00000121057	AKAP1	2.63784	7.06256	1.39337e-36
77	ENSG00000159708	LRRC36	2.62086	3.19417	1.29229e-08
78	ENSG00000165731	RET	2.62025	5.37811	9.67435e-11
79	ENSG00000164879	CA3	2.61048	6.98427	3.32152e-07
80	ENSG00000186439	TRDN	2.52923	6.61763	9.25433e-07
81	ENSG00000179008	C14orf39	2.49964	3.26863	6.59389e-10
82	ENSG00000144407	PTH2R	2.49483	3.84971	4.20076e-08
83	ENSG00000092421	SEMA6A	2.47959	7.20241	4.41814e-26
84	ENSG00000066468	FGFR2	2.46296	5.75692	6.07856e-13
85	ENSG00000165084	C8orf34	2.46259	4.05955	1.6371e-08
86	ENSG00000174939	ASPHD1	2.44891	3.37205	3.72346e-08
87	ENSG00000162998	FRZB	2.44576	4.79437	1.01651e-08
88	ENSG00000108947	EFNB3	2.43903	3.83531	4.00612e-12
89	ENSG00000157064	NMNAT2	2.43894	4.1879	1.40262e-11
90	ENSG00000196917	HCAR1	2.42333	5.36173	8.97419e-11
91	ENSG00000178662	CSRNP3	2.41699	6.5373	1.54902e-14
92	ENSG00000106004	HOXA5	2.41224	6.85371	3.86088e-22
93	ENSG00000095539	SEMA4G	2.40823	2.87014	1.58881e-09
94	ENSG00000138675	FGF5	2.40366	3.29489	7.3459e-06
95	ENSG00000180209	MYLPF	2.39439	7.05871	1.46154e-06
96	ENSG00000112379	ARFGEF3	2.39371	4.4165	2.48096e-09
97	ENSG00000151365	THRSP	2.37697	3.64676	1.58616e-06
98	ENSG00000163380	LMOD3	2.37421	3.52028	4.09529e-05
99	ENSG00000130226	DPP6	2.34943	3.18763	1.31896e-05
100	ENSG00000184564	SLITRK6	2.3389	4.98689	6.97784e-08
101	ENSG00000101470	TNNC2	2.33754	6.24544	6.97998e-06
102	ENSG00000198719	DLL1	2.31098	3.36907	2.6952e-09
103	ENSG00000116678	LEPR	2.30566	6.80004	1.1686e-16
104	ENSG00000154188	ANGPT1	2.29961	7.0239	3.36305e-14
105	ENSG00000167701	GPT	2.29496	4.12563	6.5605e-06
106	ENSG00000105997	HOXA3	2.2806	6.24628	5.37972e-21
107	ENSG00000130413	STK33	2.27467	3.16465	2.69656e-07
108	ENSG00000156427	FGF18	2.26552	5.60358	8.12767e-10
109	ENSG00000221866	PLXNA4	2.23942	6.33429	9.21129e-13
110	ENSG00000067177	PHKA1	2.2316	3.74571	1.90747e-11
111	ENSG00000164078	MST1R	2.22741	3.01341	3.73107e-08
112	ENSG00000168229	PTGDR	2.21929	2.74301	2.32708e-09
113	ENSG00000198732	SMOC1	2.21458	7.31468	9.52691e-10
114	ENSG00000260428	SCX	2.17851	4.97861	6.70763e-07
115	ENSG00000155966	AFF2	2.1738	5.04208	3.62164e-09
116	ENSG00000116141	MARK1	2.17338	5.49987	2.82702e-16
117	ENSG00000117266	CDK18	2.16025	4.16518	3.05658e-11
118	ENSG00000182732	RGS6	2.14813	3.19829	6.43451e-05
119	ENSG00000072952	IRAG1	2.14531	6.16296	3.01442e-14
120	ENSG00000138640	FAM13A	2.11884	8.09633	1.69427e-31
121	ENSG00000174749	FAM241A	2.112	5.53177	3.96218e-17
122	ENSG00000173898	SPTBN2	2.09186	2.98707	2.89324e-07
123	ENSG00000132932	ATP8A2	2.09048	3.44428	8.77253e-07
124	ENSG00000172572	PDE3A	2.07738	5.97148	2.59671e-15
125	ENSG00000198075	SULT1C4	2.07617	2.9966	2.08258e-07
126	ENSG00000105088	OLFM2	2.07578	5.33274	1.49225e-09
127	ENSG00000197576	HOXA4	2.06788	4.58076	3.92172e-12
128	ENSG00000144218	AFF3	2.06277	6.21719	7.0756e-12
129	ENSG00000162624	LHX8	2.04727	3.82835	1.18858e-05
130	ENSG00000158458	NRG2	2.04624	5.35029	9.00399e-11
131	ENSG00000125414	MYH2	2.04571	7.09348	0.00170395
132	ENSG00000170262	MRAP	2.0212	4.16617	5.10074e-06
133	ENSG00000166426	CRABP1	2.00263	4.54614	0.000445001
134	ENSG00000132854	KANK4	2.00261	4.56626	2.43387e-05
135	ENSG00000130598	TNNI2	1.98788	6.83345	0.000115582
136	ENSG00000128536	CDHR3	1.97655	3.96622	1.21418e-08
137	ENSG00000107957	SH3PXD2A	1.97629	9.7164	3.97107e-37
138	ENSG00000132170	PPARG	1.96493	6.03855	2.44799e-10
139	ENSG00000177990	DPY19L2	1.96061	3.82531	5.8108e-08
140	ENSG00000089225	TBX5	1.95654	4.77175	6.72318e-06
141	ENSG00000080493	SLC4A4	1.9547	4.05795	1.15527e-07
142	ENSG00000147257	GPC3	1.94846	7.81931	1.34513e-08
143	ENSG00000166387	PPFIBP2	1.94826	6.39807	8.18728e-20
144	ENSG00000174672	BRSK2	1.94592	3.69183	1.41387e-05
145	ENSG00000136425	CIB2	1.93867	5.0402	4.19295e-12
146	ENSG00000003989	SLC7A2	1.92441	6.99614	2.78871e-13
147	ENSG00000152270	PDE3B	1.92281	6.12678	2.93588e-11
148	ENSG00000196296	ATP2A1	1.91859	4.86757	0.000257349
149	ENSG00000080007	DDX43	1.9053	2.92504	3.40101e-05
150	ENSG00000183807	FAM162B	1.89254	2.957	1.06498e-05
151	ENSG00000171863	RPS7	1.88862	7.26402	1.48943e-11
152	ENSG00000050628	PTGER3	1.86591	6.34361	1.27667e-10
153	ENSG00000181234	TMEM132C	1.86357	3.57711	2.75925e-06
154	ENSG00000165716	DIPK1B	1.86187	3.19635	1.01792e-07
155	ENSG00000167600	CYP2S1	1.85893	3.29235	1.62851e-07
156	ENSG00000126778	SIX1	1.84056	7.1704	6.39741e-15
157	ENSG00000146147	MLIP	1.83843	3.19822	3.17481e-05
158	ENSG00000164638	SLC29A4	1.82517	5.0782	5.50297e-08
159	ENSG00000126803	HSPA2	1.82507	3.6673	4.7896e-06
160	ENSG00000170153	RNF150	1.81619	6.33674	8.09836e-17
161	ENSG00000129824	RPS4Y1	1.80295	7.20428	0.000290647
162	ENSG00000153157	SYCP2L	1.79977	3.17475	1.29757e-06
163	ENSG00000162817	C1orf115	1.79838	4.68397	1.60759e-08
164	ENSG00000164318	EGFLAM	1.79534	4.64715	7.55882e-08
165	ENSG00000102967	DHODH	1.79187	3.3444	1.20902e-08
166	ENSG00000172893	DHCR7	1.78453	3.73267	1.63778e-06
167	ENSG00000148200	NR6A1	1.77713	3.95052	6.52466e-08
168	ENSG00000138759	FRAS1	1.77599	5.30119	1.48187e-06
169	ENSG00000183287	CCBE1	1.77535	4.86056	3.55744e-06
170	ENSG00000137857	DUOX1	1.77373	4.4356	1.4845e-05
171	ENSG00000100344	PNPLA3	1.77348	3.97523	2.77721e-06
172	ENSG00000161649	CD300LG	1.76764	4.72879	2.73158e-06
173	ENSG00000196482	ESRRG	1.75879	3.40316	7.20325e-05
174	ENSG00000006432	MAP3K9	1.75249	2.75281	9.06387e-06
175	ENSG00000138336	TET1	1.74409	7.02116	1.75857e-16
176	ENSG00000120068	HOXB8	1.7403	3.0681	9.17889e-05
177	ENSG00000120658	ENOX1	1.73944	3.64792	4.83577e-07
178	ENSG00000104290	FZD3	1.72972	4.74474	1.21088e-09
179	ENSG00000167771	RCOR2	1.72723	3.53476	6.26738e-06
180	ENSG00000170549	IRX1	1.72719	4.84486	6.60272e-05
181	ENSG00000174938	SEZ6L2	1.71883	7.23592	1.25973e-05
182	ENSG00000137872	SEMA6D	1.71126	5.65527	2.99634e-10
183	ENSG00000176595	KBTBD11	1.71034	4.41555	8.16384e-08
184	ENSG00000168679	SLC16A4	1.70419	3.90869	6.98601e-07
185	ENSG00000163638	ADAMTS9	1.69735	6.70387	6.18557e-14
186	ENSG00000185000	DGAT1	1.69703	5.49954	3.05099e-10
187	ENSG00000060709	RIMBP2	1.69192	3.35435	0.000209295
188	ENSG00000197406	DIO3	1.69024	3.99271	4.45304e-05
189	ENSG00000185818	NAT8L	1.6878	3.35023	6.06561e-05
190	ENSG00000198774	RASSF9	1.6864	4.24812	1.08418e-06
191	ENSG00000266412	NCOA4	1.68464	7.21743	3.18782e-19
192	ENSG00000186854	TRABD2A	1.6684	4.70787	3.12099e-07
193	ENSG00000115425	PECR	1.66502	3.86871	8.09678e-06
194	ENSG00000161267	BDH1	1.66358	3.99891	6.33498e-06
195	ENSG00000117115	PADI2	1.65227	3.03026	0.000771899
196	ENSG00000148053	NTRK2	1.6508	7.81444	6.35658e-08
197	ENSG00000173641	HSPB7	1.64974	4.73093	1.27975e-06
198	ENSG00000078399	HOXA9	1.64151	5.687	9.51101e-09
199	ENSG00000114923	SLC4A3	1.6385	4.35988	1.21952e-07
200	ENSG00000064225	ST3GAL6	1.63016	5.14221	2.16095e-11
201	ENSG00000178222	RNF212	1.62579	4.53492	9.5854e-06
202	ENSG00000185482	STAC3	1.62502	5.81321	3.25564e-06
203	ENSG00000091129	NRCAM	1.62448	3.56383	0.000267621
204	ENSG00000169750	RAC3	1.62414	4.15326	8.27822e-10
205	ENSG00000163932	PRKCD	1.6204	4.98269	3.1606e-17
206	ENSG00000078814	MYH7B	1.61871	3.0427	6.7447e-07
207	ENSG00000170681	CAVIN4	1.61198	3.56829	5.12244e-05
208	ENSG00000139174	PRICKLE1	1.60869	7.48533	8.20246e-18
209	ENSG00000177283	FZD8	1.60799	4.70932	3.05529e-06
210	ENSG00000070182	SPTB	1.60572	3.33187	0.000844684
211	ENSG00000108387	SEPTIN4	1.60302	5.22981	1.00254e-10
212	ENSG00000183066	WBP2NL	1.5988	2.97691	1.40566e-05
213	ENSG00000186205	MTARC1	1.59242	4.40032	2.95871e-05
214	ENSG00000173894	CBX2	1.59129	3.04946	1.0434e-05
215	ENSG00000176894	PXMP2	1.58604	4.83445	1.28978e-10
216	ENSG00000130222	GADD45G	1.58232	4.99588	0.000161579
217	ENSG00000213420	GPC2	1.57448	4.81713	4.31844e-08
218	ENSG00000254726	MEX3A	1.57164	6.49773	2.4739e-09
219	ENSG00000187260	WDR86	1.56973	3.87373	3.80248e-05
220	ENSG00000181856	SLC2A4	1.5695	3.48054	0.000313031
221	ENSG00000261115	TMEM178B	1.56493	2.7198	0.000122727
222	ENSG00000013503	POLR3B	1.56436	5.08199	1.53611e-08
223	ENSG00000153404	PLEKHG4B	1.56364	4.56345	0.000148485
224	ENSG00000154263	ABCA10	1.56176	7.14586	8.55126e-08
225	ENSG00000144908	ALDH1L1	1.55887	3.66035	0.000363389
226	ENSG00000124006	OBSL1	1.55829	6.83867	9.46552e-19
227	ENSG00000103460	TOX3	1.55603	3.21041	0.00231493
228	ENSG00000188191	PRKAR1B	1.55536	5.45842	2.21665e-10
229	ENSG00000099282	TSPAN15	1.55259	5.59512	1.8063e-07
230	ENSG00000197756	RPL37A	1.54517	11.3803	4.05078e-30
231	ENSG00000107611	CUBN	1.54338	3.59288	5.43475e-07
232	ENSG00000109339	MAPK10	1.53916	5.98646	8.76998e-08
233	ENSG00000166123	GPT2	1.53888	4.49889	3.14124e-06
234	ENSG00000142599	RERE	1.53582	8.56554	2.76194e-28
235	ENSG00000165269	AQP7	1.53067	5.77958	0.000278524
236	ENSG00000182774	RPS17	1.52974	9.93066	7.62779e-22
237	ENSG00000164309	CMYA5	1.52112	7.75867	2.57771e-05
238	ENSG00000172000	ZNF556	1.51972	3.37353	0.000115289
239	ENSG00000100347	SAMM50	1.51494	6.04041	1.8314e-20
240	ENSG00000170162	VGLL2	1.51251	4.40775	0.002166
241	ENSG00000144199	FAHD2B	1.51201	2.89141	0.000108878
242	ENSG00000198203	SULT1C2	1.51172	3.63374	0.000166284
243	ENSG00000118181	RPS25	1.51072	8.89928	2.38056e-27
244	ENSG00000101049	SGK2	1.50943	4.14437	8.79597e-05
245	ENSG00000134020	PEBP4	1.50508	3.40876	0.000795363
246	ENSG00000113494	PRLR	1.50111	5.1388	0.000330474
247	ENSG00000140443	IGF1R	1.50038	6.5295	3.23528e-13

## Sheet: Pleomorphic LPS
	ENSEMBL	SYMBOL	logFC	logCPM	PValue
1	ENSG00000135451	TROAP	2.3737	4.98786	3.19914e-12
2	ENSG00000105509	HAS1	2.11699	4.17142	5.24879e-05
3	ENSG00000161888	SPC24	2.0225	4.22335	7.17934e-08
4	ENSG00000184661	CDCA2	1.95832	4.22646	8.38665e-09
5	ENSG00000149970	CNKSR2	1.94816	2.95899	0.000145182
6	ENSG00000267368	UPK3BL1	1.94418	3.21433	0.00148157
7	ENSG00000205269	TMEM170B	1.85794	3.71556	3.49094e-05
8	ENSG00000024526	DEPDC1	1.85341	4.46626	1.13426e-06
9	ENSG00000142945	KIF2C	1.83498	3.88853	7.32704e-07
10	ENSG00000126787	DLGAP5	1.82709	4.23252	1.08002e-08
11	ENSG00000166845	C18orf54	1.82383	3.98736	2.19672e-07
12	ENSG00000105173	CCNE1	1.79949	3.39599	7.78382e-05
13	ENSG00000183578	TNFAIP8L3	1.74123	2.8777	0.000569281
14	ENSG00000130821	SLC6A8	1.72193	3.97741	0.000795753
15	ENSG00000157766	ACAN	1.7138	4.689	0.00166657
16	ENSG00000118193	KIF14	1.70655	4.2872	5.75849e-07
17	ENSG00000112984	KIF20A	1.69055	3.32341	0.000129381
18	ENSG00000196460	RFX8	1.68234	3.50995	0.000347397
19	ENSG00000146670	CDCA5	1.68107	3.56119	7.70321e-06
20	ENSG00000197635	DPP4	1.62241	3.73383	0.000387659
21	ENSG00000143228	NUF2	1.62104	5.21876	1.20206e-06
22	ENSG00000138180	CEP55	1.6173	4.00946	1.60898e-05
23	ENSG00000115361	ACADL	1.61504	2.85351	0.00189934
24	ENSG00000128482	RNF112	1.6124	3.59059	0.000607344
25	ENSG00000168546	GFRA2	1.60645	4.06536	8.2801e-05
26	ENSG00000124343	XG	1.60035	3.05984	0.00323025
27	ENSG00000183856	IQGAP3	1.59944	4.96121	2.15641e-06
28	ENSG00000167601	AXL	1.59467	6.77099	1.50657e-07
29	ENSG00000075218	GTSE1	1.58947	4.50212	3.69193e-08
30	ENSG00000237649	KIFC1	1.58567	4.71073	5.806e-06
31	ENSG00000170270	GON7	1.58084	3.23779	4.30836e-05
32	ENSG00000154839	SKA1	1.57222	3.16279	0.000131922
33	ENSG00000134690	CDCA8	1.56045	3.9081	4.48258e-06
34	ENSG00000121957	GPSM2	1.55132	5.36443	4.09823e-06
35	ENSG00000162591	MEGF6	1.50793	3.43959	0.00159037
36	ENSG00000102384	CENPI	1.50561	3.27569	0.000181793
37	ENSG00000090889	KIF4A	1.50078	4.62243	2.26251e-05
